# Supplementary material
Source: Springer Nature journal article supplement (https://www.springermedizin.de/resource/supplementary/12889_2006_758_MOESM2_ESM.pdf/9501704)

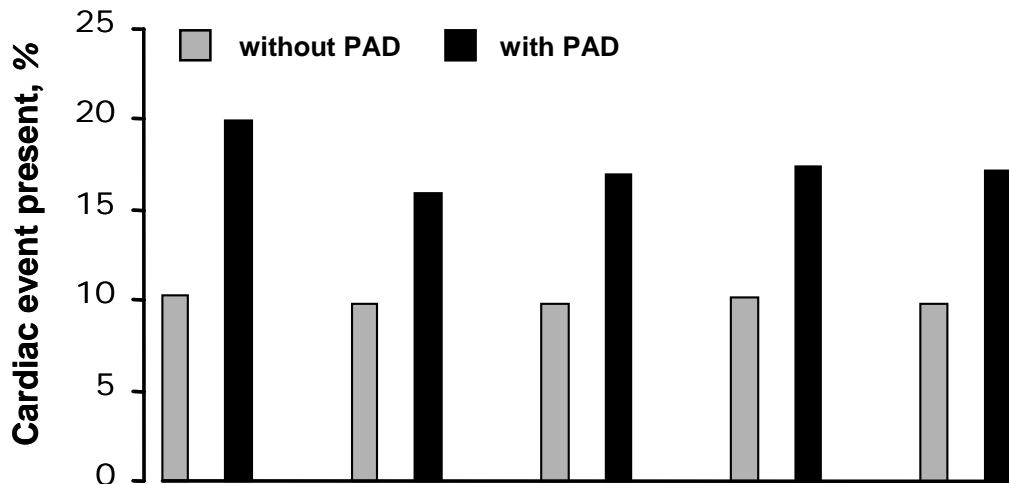

| Method of ABI calculation | #1   | #2   | #3   | #4   | #5   |
|---------------------------|------|------|------|------|------|
| Odds Ratio (95 % CI)      | 2.2  | 1.7  | 1.9  | 1.9  | 1.9  |
| Sensitivity, %            | 30.1 | 46.1 | 41.3 | 35.4 | 40.3 |
| Specificity, %            | 83.6 | 67.1 | 72.6 | 77.3 | 73.9 |

Supplement: MOESM2 [file 9501704]
